# Supplementary material
Source: PubMed Central journal article supplement (PMC8193970)
Supplement: mmc1.pdf [file mmc1.pdf]

# **Symptoms reported by SARS-CoV-2 seropositive and seronegative healthcare and administrative employees in Denmark from May to August 2020**

## **Supplementary material**

|                                                                                                                                                             |    |
|-------------------------------------------------------------------------------------------------------------------------------------------------------------|----|
| Questionnaire Items .....                                                                                                                                   | 2  |
| Figure 1: Flowchart.....                                                                                                                                    | 5  |
| Table 1: Characteristics of the cohort by sex (n = 11 138).....                                                                                             | 6  |
| Table 2: Association between SARS-CoV-2 serological status and reporting symptoms adjusted for sex, age, BMI and current smoking status (n = 10 776) .....  | 7  |
| Table 3: Association between SARS-CoV-2 serological status and reporting symptoms by sex adjusted for age (n = 11 138) .....                                | 8  |
| Table 4: Association between SARS-CoV-2 serological status and reporting symptoms by sex adjusted for age, BMI and current smoking status (n = 10 776)..... | 9  |
| Table 5: Association between SARS-CoV-2 serological status and reporting symptoms by chronic disease status adjusted for sex and age (n = 11 138) .....     | 10 |

## Questionnaire Items

The following items from the questionnaire were used in the study.

### Rygning/smoking

- Dansk: “Ryger du?”  
Svarmuligheder: “Nej”, “Nej, men jeg har tidligere røget”, “Ja – sommetider”, “Ja – dagligt, mindre end 10 om dagen”, “Ja – dagligt, 10 eller flere om dagen”, “Ønsker ikke at svare.”
- *English: “Are you smoking”?*  
*“Answer options: “No”, “No, but I have smoked before”, “Yes – sometimes”, “Yes - daily, less than 10 a day”, “Yes - daily, 10 or more a day”, “Do not want to answer.”*

### Højde/height

- Dansk: “Hvor høj er du i centimeter (cm)?”
- *English: “How tall are you in centimetres (cm)?”*

### Vægt/weight

- Dansk: “Hvor meget vejer du i kilogram (kg)?”
- *English: “How much do you weigh in kilograms (kg)?”*

### Symptomer/symptoms

- Dansk: “Har du haft nogle af følgende symptomer siden 1. marts? Sæt gerne flere kryds”.  
Svarmuligheder: “Feber”, “Ondt i halsen”, “Hoste”, “Åndenød”, “Hovedpine”, “Muskel- eller ledsmerter”, “Træt eller udmattet”, “Manglende smags/lugtesans”.

- *English: “Have you had any of the following symptoms since March 1? More than one symptom is allowed”.*

*Answer options: “Fever”, “Sore throat”, “Cough”, “Dyspnoea”, “Headache”, “Muscle or joint ache”, “Fatigue”, “Loss of sense of taste and smell”.*

### **Symptomvarighed/symptom duration**

- Dansk: “Hvornår begyndte symptomerne?”
- *English: “When did the symptoms begin?”*

- Dansk: “Har du stadig symptomer?”

Svarmuligheder: “Ja”, “Nej”.

- *English: “Do you still have symptoms?”*

*Answer options: “Yes”, “No”.*

- Dansk: “Hvornår holdt symptomerne op?”

- *English: “When did the symptoms stop?”*

### **Komorbiditet/comorbidity**

- Dansk: “Lider du af (eller får medicin i behandlingen af) følgende kroniske sygdomme? (Vælg gerne flere udsagn)”.

Svarmuligheder: “Nej”, “Astma”, “Sukkersyge”, “Kroniske lungesygdomme udover astma (fx KOL, emfysem og andre tilstande der påvirker din vejrtrækning)”, “Hjertesygdomme”, “Nyresygdomme”, “Svækket immunforsvar som følge af medicinsk behandling eller

kroniske tilstande, såsom hel eller delvis fjernelse af milten, organtransplantation, hiv/aids, kræft, svær gigt, etc.”, “Højt blodtryk (hypertension)”.

- *English: “Do you suffer from (or receive medication in the treatment of) the following chronic diseases? More than one condition is allowed”.*

*Answer options: “No”, “Asthma”, “Diabetes”, “Chronic lung diseases in addition to asthma (e.g., COPD, emphysema and other respiratory tract conditions)”, “Heart disease”, “Kidney disease”, “Weakened immune system due to medical treatment or chronic conditions such as complete or partial removal of the spleen, organ transplantation, HIV/AIDS, cancer, severe arthritis, etc.”, “High blood pressure (hypertension)”.*

**Figure 1: Flowchart**

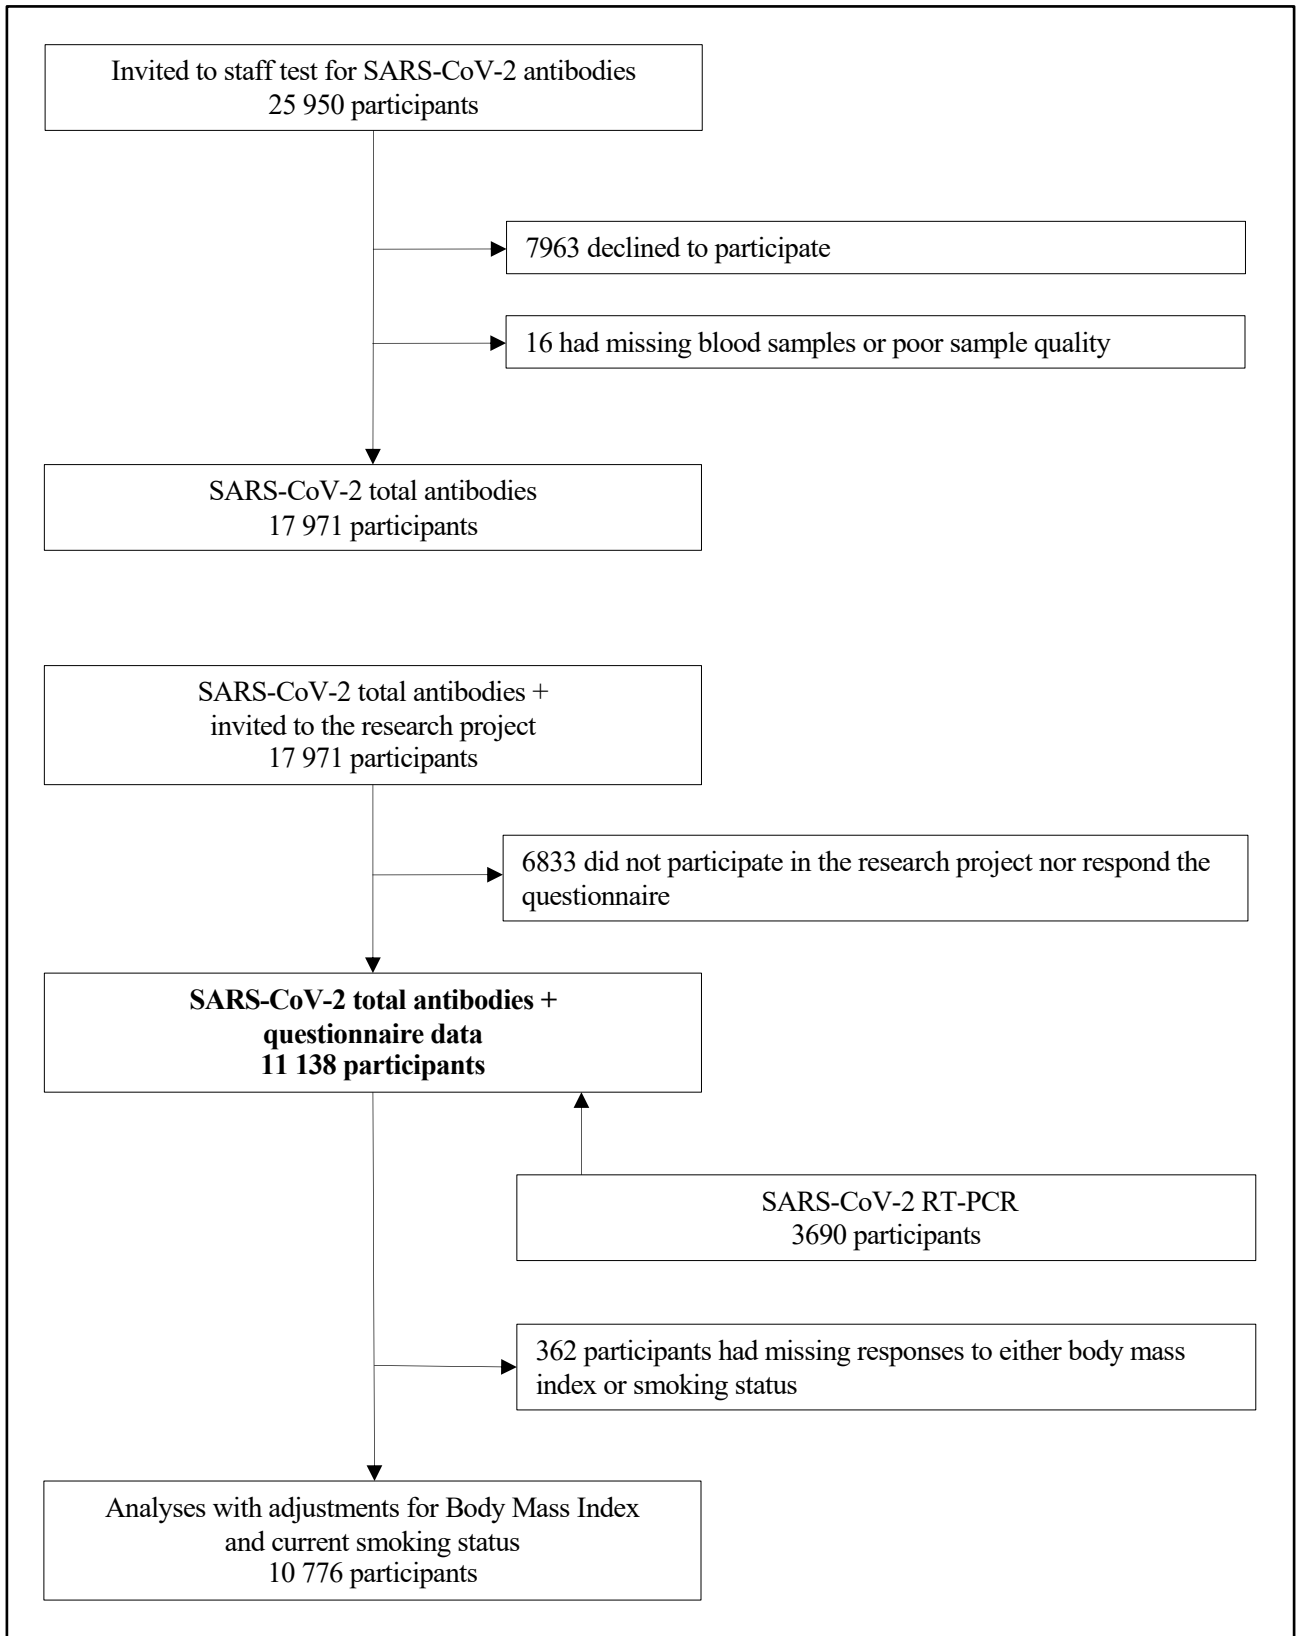

**Table 1: Characteristics of the cohort by sex (n = 11 138)**

|                              | <b>Women</b> | <b>Men</b>  | <b>P-value</b> |
|------------------------------|--------------|-------------|----------------|
| <b>Participants</b>          | 9795 (88%)   | 1343 (12%)  |                |
| Seropositive                 | 406 (4%)     | 41 (3%)     | 0.056          |
| Seronegative                 | 9389 (96%)   | 1302 (97%)  |                |
| <b>Age, years</b>            | 46 (37; 55)  | 45 (36; 57) | 0.1033         |
| 18–39                        | 3219 (33%)   | 475 (35%)   | < 0.001        |
| 40–59                        | 5400 (55%)   | 621 (46%)   |                |
| ≥60                          | 1176 (12%)   | 247 (18%)   |                |
| <b>Smoking status</b>        |              |             |                |
| Non-current smoker           | 8743 (89%)   | 1192 (89%)  | 0.673          |
| Current smoker               | 850 (9%)     | 121 (9%)    |                |
| Missing                      | 202 (2%)     | 30 (2%)     |                |
| <b>BMI, kg/m<sup>2</sup></b> | 24 (22; 28)  | 25 (23; 28) | 0.7846         |
| BMI < 30                     | 8138 (83%)   | 1143 (85%)  | 0.024          |
| BMI ≥ 30 (obese)             | 1443 (15%)   | 165 (12%)   |                |
| Missing                      | 224 (2%)     | 35 (3%)     |                |
| <b>RT-PCR</b>                |              |             |                |
| SARS-CoV-2 RNA<br>- positive | 216 (2%)     | 23 (2%)     | 0.549          |
| SARS-CoV-2 RNA<br>- negative | 3076 (32%)   | 375 (28%)   |                |
| <b>Comorbidity</b>           |              |             |                |
| No                           | 8139 (83%)   | 1048 (78%)  | < 0.001        |
| Yes                          | 1656 (17%)   | 295 (22%)   |                |

Data are presented as numbers with percentages.

Age and BMI are further presented as medians with interquartile ranges (IQR).

To compare groups, t-tests were used for normally distributed data and Mann-Whitney U tests were used for non-normally distributed data. Chi-squared tests were used to compare categorical values.

**Table 2: Association between SARS-CoV-2 serological status and reporting symptoms adjusted for sex, age, BMI and current smoking status (n = 10 776)**

| <b>Symptoms</b>                         | <b>Number <sup>a</sup></b> | <b>OR (95% CI) <sup>b</sup></b> |
|-----------------------------------------|----------------------------|---------------------------------|
| <b>Loss of sense of taste and smell</b> |                            |                                 |
| Seronegative (reference)                | 285                        | 1                               |
| Seropositive                            | 221                        | 37.2 (29.7–46.5)                |
| <b>Fever</b>                            |                            |                                 |
| Seronegative (reference)                | 1153                       | 1                               |
| Seropositive                            | 234                        | 9.4 (7.7–11.4)                  |
| <b>Dyspnoea</b>                         |                            |                                 |
| Seronegative (reference)                | 587                        | 1                               |
| Seropositive                            | 132                        | 7.2 (5.7–9.0)                   |
| <b>Muscle or joint ache</b>             |                            |                                 |
| Seronegative (reference)                | 1676                       | 1                               |
| Seropositive                            | 239                        | 6.4 (5.3–7.8)                   |
| <b>Fatigue</b>                          |                            |                                 |
| Seronegative (reference)                | 2538                       | 1                               |
| Seropositive                            | 282                        | 5.7 (4.7–7.0)                   |
| <b>Cough</b>                            |                            |                                 |
| Seronegative (reference)                | 2297                       | 1                               |
| Seropositive                            | 223                        | 3.7 (3.0–4.5)                   |
| <b>Headache</b>                         |                            |                                 |
| Seronegative (reference)                | 3973                       | 1                               |
| Seropositive                            | 294                        | 3.3 (2.7–4.1)                   |
| <b>Sore throat</b>                      |                            |                                 |
| Seronegative (reference)                | 3078                       | 1                               |
| Seropositive                            | 208                        | 2.1 (1.7–2.6)                   |

Multivariable logistic regression exploring the association between SARS-CoV-2 serological status and reporting symptoms adjusted for sex, age (categorical: 18–39, 40–59, ≥60), BMI (categorical: non-obese defined as a BMI below 30 kg/m<sup>2</sup>, obesity defined as a BMI exceeding or equal to 30 kg/m<sup>2</sup>) and current smoking status (categorical: non-current smoker, current smoker) (Confounder model 2).

This analysis included 10 776 participants as 362 participants had missing responses to either BMI or smoking status.

<sup>a</sup>Number of participants reporting the specific symptom.

<sup>b</sup>Odds ratios with 95% CIs.

**Table 3: Association between SARS-CoV-2 serological status and reporting symptoms by sex adjusted for age (n = 11 138)**

| Symptoms                                | Women               |                          | Men                 |                          |
|-----------------------------------------|---------------------|--------------------------|---------------------|--------------------------|
|                                         | Number <sup>a</sup> | OR (95% CI) <sup>b</sup> | Number <sup>a</sup> | OR (95% CI) <sup>b</sup> |
| <b>Loss of sense of taste and smell</b> |                     |                          |                     |                          |
| Seronegative (reference)                | 262                 | 1                        | 31                  | 1                        |
| Seropositive                            | 208                 | 36.5 (29.0–45.9)         | 17                  | 27.1 (13.1–56.0)         |
| <b>Fever</b>                            |                     |                          |                     |                          |
| Seronegative (reference)                | 1057                | 1                        | 122                 | 1                        |
| Seropositive                            | 217                 | 9.0 (7.3–11.1)           | 22                  | 10.8 (5.7–20.6)          |
| <b>Dyspnoea</b>                         |                     |                          |                     |                          |
| Seronegative (reference)                | 539                 | 1                        | 66                  | 1                        |
| Seropositive                            | 120                 | 6.9 (5.5–8.6)            | 13                  | 8.8 (4.3–18.0)           |
| <b>Muscle or joint ache</b>             |                     |                          |                     |                          |
| Seronegative (reference)                | 1530                | 1                        | 187                 | 1                        |
| Seropositive                            | 218                 | 5.9 (4.9–7.3)            | 25                  | 9.5 (5.0–18.2)           |
| <b>Fatigue</b>                          |                     |                          |                     |                          |
| Seronegative (reference)                | 2330                | 1                        | 268                 | 1                        |
| Seropositive                            | 262                 | 5.5 (4.5–6.8)            | 25                  | 5.4 (2.8–10.4)           |
| <b>Cough</b>                            |                     |                          |                     |                          |
| Seronegative (reference)                | 2073                | 1                        | 278                 | 1                        |
| Seropositive                            | 210                 | 3.8 (3.1–4.6)            | 18                  | 2.8 (1.5–5.3)            |
| <b>Headache</b>                         |                     |                          |                     |                          |
| Seronegative (reference)                | 3730                | 1                        | 330                 | 1                        |
| Seropositive                            | 276                 | 3.2 (2.6–4.0)            | 24                  | 3.9 (2.1–7.4)            |
| <b>Sore throat</b>                      |                     |                          |                     |                          |
| Seronegative (reference)                | 2864                | 1                        | 289                 | 1                        |
| Seropositive                            | 194                 | 2.1 (1.7–2.5)            | 18                  | 2.5 (1.3–4.7)            |

Multivariable logistic regression exploring the association between SARS-CoV-2 serological status and reporting symptoms by sex adjusted for age (categorical: 18–39, 40–59, ≥60) (Confounder model 1).

<sup>a</sup> Number of participants reporting the specific symptom.

<sup>b</sup> Odds ratios with 95% CIs.



**Table 4: Association between SARS-CoV-2 serological status and reporting symptoms by sex adjusted for age, BMI and current smoking status (n = 10 776)**

| Symptoms                                | Women               |                          | Men                 |                          |
|-----------------------------------------|---------------------|--------------------------|---------------------|--------------------------|
|                                         | Number <sup>a</sup> | OR (95% CI) <sup>b</sup> | Number <sup>a</sup> | OR (95% CI) <sup>b</sup> |
| <b>Loss of sense of taste and smell</b> |                     |                          |                     |                          |
| Seronegative (reference)                | 254                 | 1                        | 31                  | 1                        |
| Seropositive                            | 204                 | 38.3 (30.2–48.4)         | 17                  | 27.5 (13.1–57.7)         |
| <b>Fever</b>                            |                     |                          |                     |                          |
| Seronegative (reference)                | 1033                | 1                        | 120                 | 1                        |
| Seropositive                            | 212                 | 9.2 (7.4–11.3)           | 22                  | 11.4 (5.9–22.1)          |
| <b>Dyspnoea</b>                         |                     |                          |                     |                          |
| Seronegative (reference)                | 521                 | 1                        | 66                  | 1                        |
| Seropositive                            | 119                 | 7.0 (5.6–8.9)            | 13                  | 10.0 (4.8–20.9)          |
| <b>Muscle or joint ache</b>             |                     |                          |                     |                          |
| Seronegative (reference)                | 1493                | 1                        | 183                 | 1                        |
| Seropositive                            | 214                 | 6.1 (5.0–7.5)            | 25                  | 10.7 (5.5–20.8)          |
| <b>Fatigue</b>                          |                     |                          |                     |                          |
| Seronegative (reference)                | 134                 | 1                        | 15                  | 1                        |
| Seropositive                            | 257                 | 5.7 (4.6–7.1)            | 25                  | 5.8 (3.0–11.3)           |
| <b>Cough</b>                            |                     |                          |                     |                          |
| Seronegative (reference)                | 2022                | 1                        | 275                 | 1                        |
| Seropositive                            | 205                 | 3.8 (3.1–4.6)            | 18                  | 3.0 (1.6–5.7)            |
| <b>Headache</b>                         |                     |                          |                     |                          |
| Seronegative (reference)                | 3646                | 1                        | 327                 | 1                        |
| Seropositive                            | 270                 | 3.3 (2.6–4.1)            | 24                  | 4.1 (2.1–7.8)            |
| <b>Sore throat</b>                      |                     |                          |                     |                          |
| Seronegative (reference)                | 2794                | 1                        | 284                 | 1                        |
| Seropositive                            | 190                 | 2.1 (1.7–2.6)            | 18                  | 2.5 (1.3–4.8)            |

Multivariable logistic regression exploring the association between SARS-CoV-2 serological status and reporting symptoms by sex adjusted for age (categorical: 18–39, 40–59, ≥60), BMI (categorical: non-obese defined as a BMI below 30 kg/m<sup>2</sup>, obesity defined as a BMI exceeding or equal to 30 kg/m<sup>2</sup>) and current smoking status (categorical: non-current smoker, current smoker) (Confounder model 2). This analysis included 10 776 participants as 362 participants had missing responses to either BMI or smoking status.

<sup>a</sup> Number of participants reporting the specific symptom.

<sup>b</sup> Odds ratios with 95% CIs.

**Table 5: Association between SARS-CoV-2 serological status and reporting symptoms by chronic disease status adjusted for sex and age (n = 11 138)**

| Symptoms                                | Comorbidity         |                          |                     |                          |
|-----------------------------------------|---------------------|--------------------------|---------------------|--------------------------|
|                                         | No chronic disease  |                          | Chronic disease     |                          |
|                                         | Number <sup>a</sup> | OR (95% CI) <sup>b</sup> | Number <sup>a</sup> | OR (95% CI) <sup>b</sup> |
| <b>Loss of sense of taste and smell</b> |                     |                          |                     |                          |
| Seronegative (reference)                | 239                 | 1                        | 54                  | 1                        |
| Seropositive                            | 193                 | 35.4 (27.9–44.9)         | 32                  | 37.4 (21.1–66.1)         |
| <b>Fever</b>                            |                     |                          |                     |                          |
| Seronegative (reference)                | 944                 | 1                        | 235                 | 1                        |
| Seropositive                            | 208                 | 9.6 (7.8–11.9)           | 31                  | 7.3 (4.3–12.3)           |
| <b>Dyspnoea</b>                         |                     |                          |                     |                          |
| Seronegative (reference)                | 420                 | 1                        | 185                 | 1                        |
| Seropositive                            | 113                 | 8.2 (6.5–10.4)           | 20                  | 4.5 (2.6–7.8)            |
| <b>Muscle or joint ache</b>             |                     |                          |                     |                          |
| Seronegative (reference)                | 1348                | 1                        | 369                 | 1                        |
| Seropositive                            | 204                 | 6.2 (5.0–7.6)            | 39                  | 7.3 (4.3–12.4)           |
| <b>Fatigue</b>                          |                     |                          |                     |                          |
| Seronegative (reference)                | 2098                | 1                        | 500                 | 1                        |
| Seropositive                            | 250                 | 5.8 (4.7–7.2)            | 37                  | 4.3 (2.5–7.4)            |
| <b>Cough</b>                            |                     |                          |                     |                          |
| Seronegative (reference)                | 1838                | 1                        | 513                 | 1                        |
| Seropositive                            | 196                 | 3.9 (3.1–4.8)            | 32                  | 2.9 (1.8–4.9)            |
| <b>Headache</b>                         |                     |                          |                     |                          |
| Seronegative (reference)                | 3345                | 1                        | 715                 | 1                        |
| Seropositive                            | 257                 | 3.2 (2.6–3.9)            | 43                  | 4.0 (2.3–7.0)            |
| <b>Sore throat</b>                      |                     |                          |                     |                          |
| Seronegative (reference)                | 2582                | 1                        | 571                 | 1                        |
| Seropositive                            | 184                 | 2.1 (1.7–2.6)            | 28                  | 1.9 (1.2–3.3)            |

Multivariable logistic regression exploring the association between SARS-CoV-2 serological status and reporting symptoms by chronic disease status adjusted for sex and age (categorical: 18–39, 40–59, ≥60) (Confounder model 1).

<sup>a</sup> Number of participants reporting the specific symptom.

<sup>b</sup> Odds ratios with 95% CIs.
